# Supplementary material for: In vitro evaluation of cerebrospinal fluid velocity measurement in type I Chiari malformation: repeatability, reproducibility, and agreement using 2D phase contrast and 4D flow MRI
Source: PubMed Central journal article supplement (PMC7977612; doi:10.1186/s12987-021-00246-3), 2021-03-18
Supplement: 12987_2021_246_MOESM1_ESM.pdf [file 12987_2021_246_MOESM1_ESM.pdf]

**Supplementary Material.**

**Figure S1A-D.** Forest Plot of meta-analysis separated by imaging modality (2D PC MRI vs 4D PC MRI) and Chiari vs healthy populations.

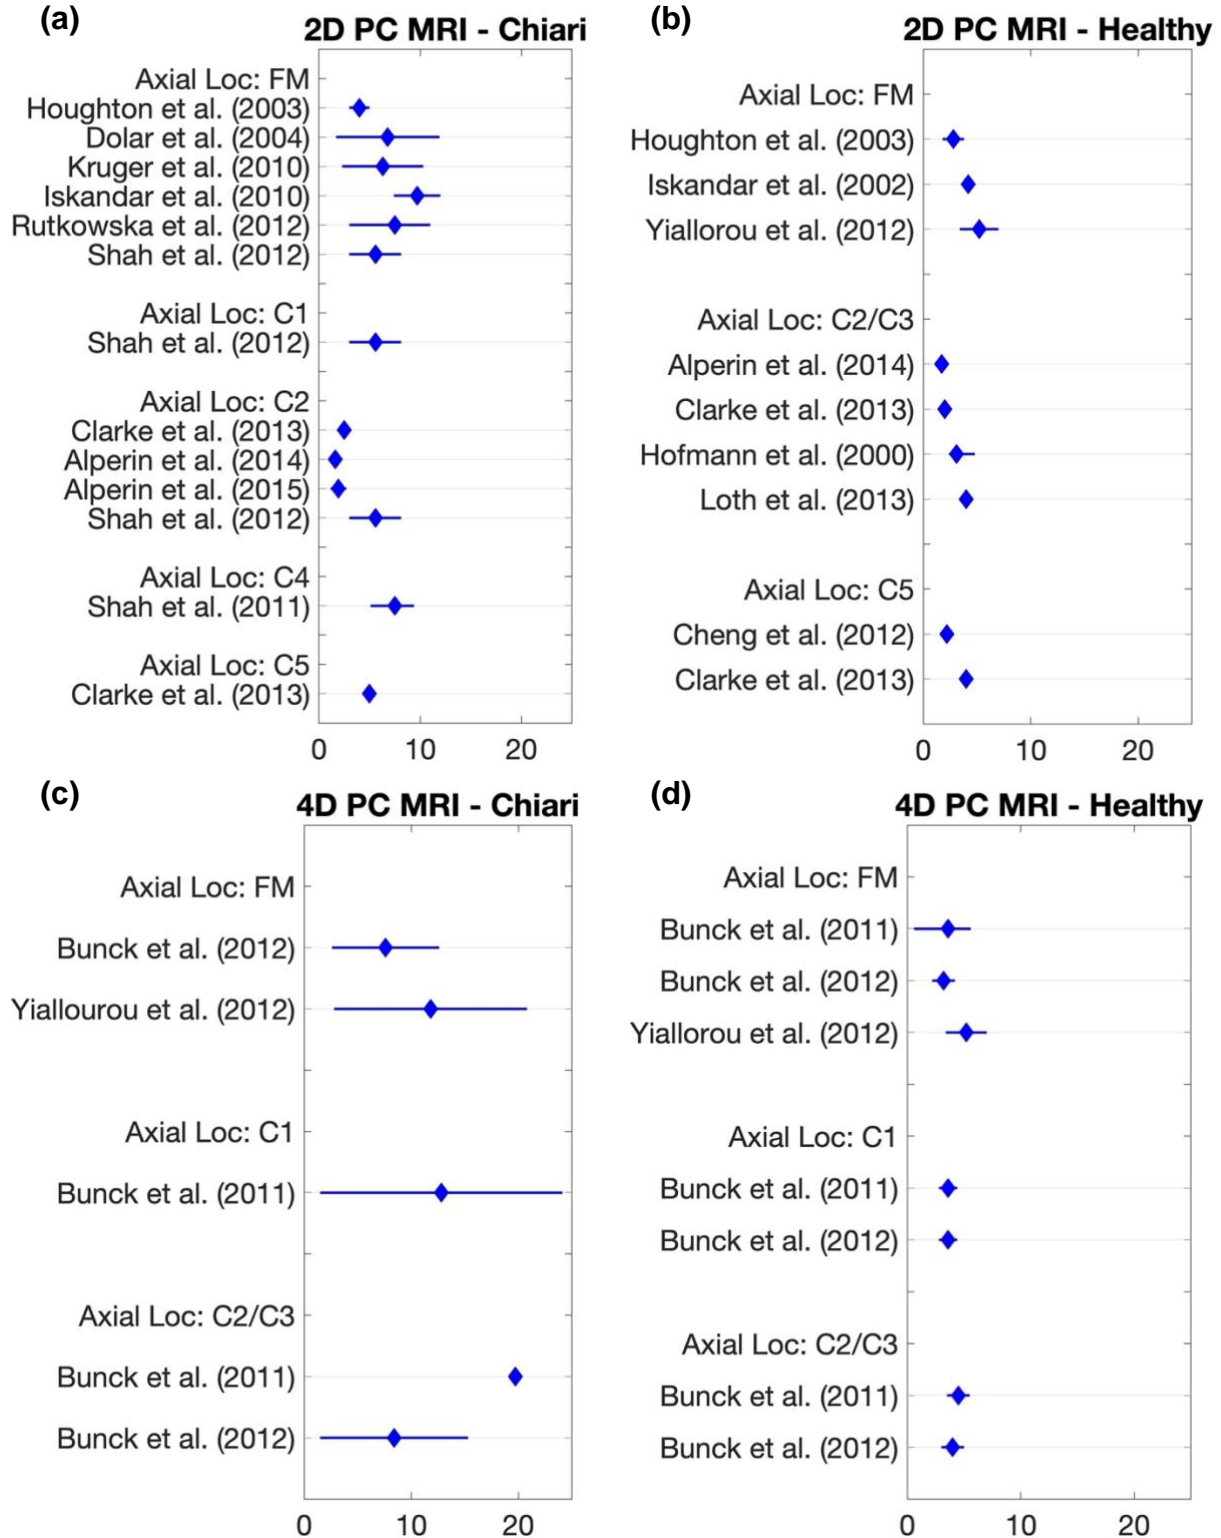

**Table S1.** Effect sizes and corresponding p values estimated from the secondary linear mixed-effects model for velocity measurements. This model uses Center 2 as the baseline and includes interactions between scanning modality, scanning center, and axial position of imaging. The mean effect size is provided, along with the 95% confidence interval (CI). We used Bonferroni correction to account for multiple testing. \* represents statistical significance under Bonferroni correction where the threshold is  $p < 0.05/14=0.0036$ .

| Effect                                   | Effect Size (95% CI) [cm/s] | p value                   |
|------------------------------------------|-----------------------------|---------------------------|
| Intercept<br>(Center 2: 2D PC MRI at FM) | 13.70 (13.27, 14.14)        | $4.57 \times 10^{-141}$ * |
| Scan type (4D – 2D)                      | -0.02 (-0.28, 0.24)         | 0.86                      |
| Center 1                                 | 0.45 (-0.36, 1.27)          | 0.27                      |
| Center 3                                 | -1.64 (-2.29, -0.99)        | 0.11                      |
| Center 4                                 | -2.06 (-2.44, -1.69)        | $1.40 \times 10^{-06}$ *  |
| Center 5                                 | -0.72 (-1.59, 0.15)         | $4.17 \times 10^{-22}$ *  |
| C1                                       | -0.80 (-1.36, -0.24)        | 0.01                      |
| C2M                                      | -0.49 (-0.96, -0.02)        | 0.04                      |
| C2B                                      | 0.01 (-0.45, 0.48)          | 0.95                      |
| C3                                       | -1.21 (-1.67, -0.75)        | $5.78 \times 10^{-07}$ *  |
| C4                                       | -1.36 (-1.85, -0.87)        | $1.01 \times 10^{-07}$ *  |
| C5                                       | -0.54 (-1.14, 0.07)         | 0.08                      |
| C6                                       | -1.26 (-1.77, -0.75)        | $1.89 \times 10^{-06}$ *  |
| C7                                       | -1.71 (-2.17, -1.24)        | $8.37 \times 10^{-12}$    |
